# Supplementary material for: Coffee peel extracts ameliorate non-alcoholic fatty liver diseaseviaa fibroblast growth factor 21–adiponectin signaling pathway
Source: Royal Society of Chemistry journal article supplement (doi:10.1039/d2fo00081d), 2022-01-01
Supplement: d2fo00081d1.pdf [file d2fo00081d1.pdf]

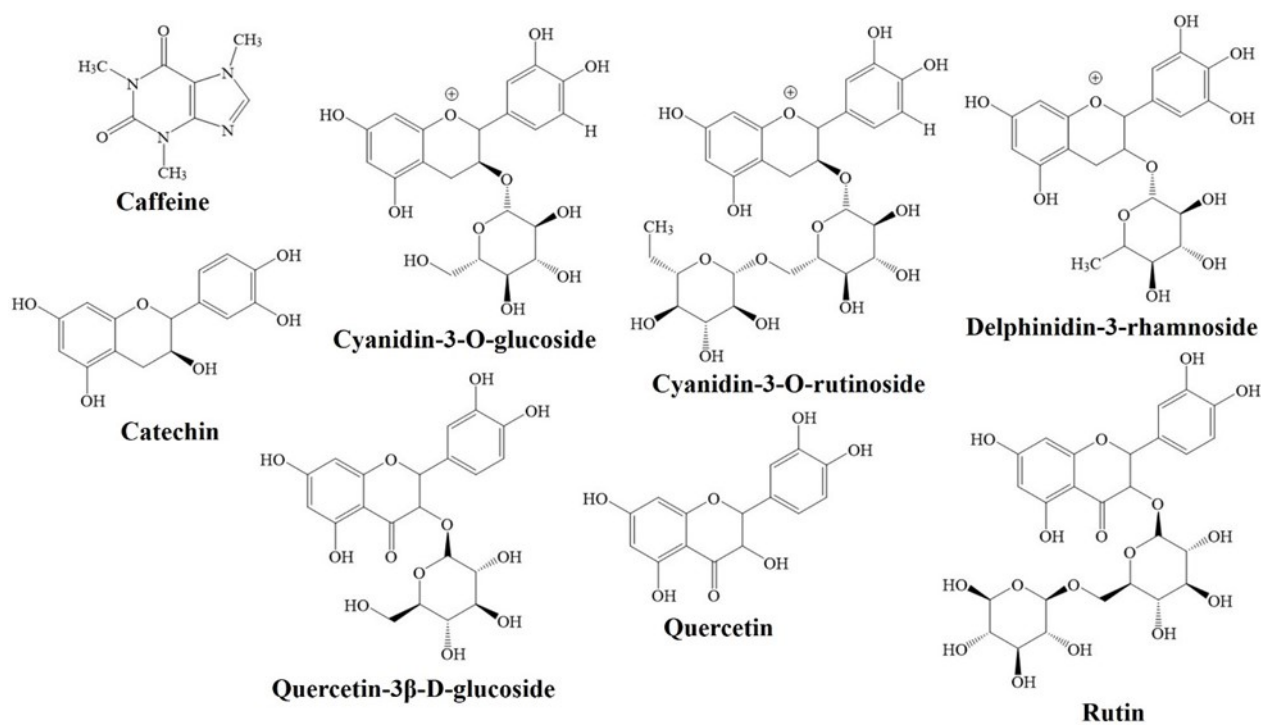

**Supplementary Figure 1.** Structures of flavonoids and caffeine were detected from CP extracts.

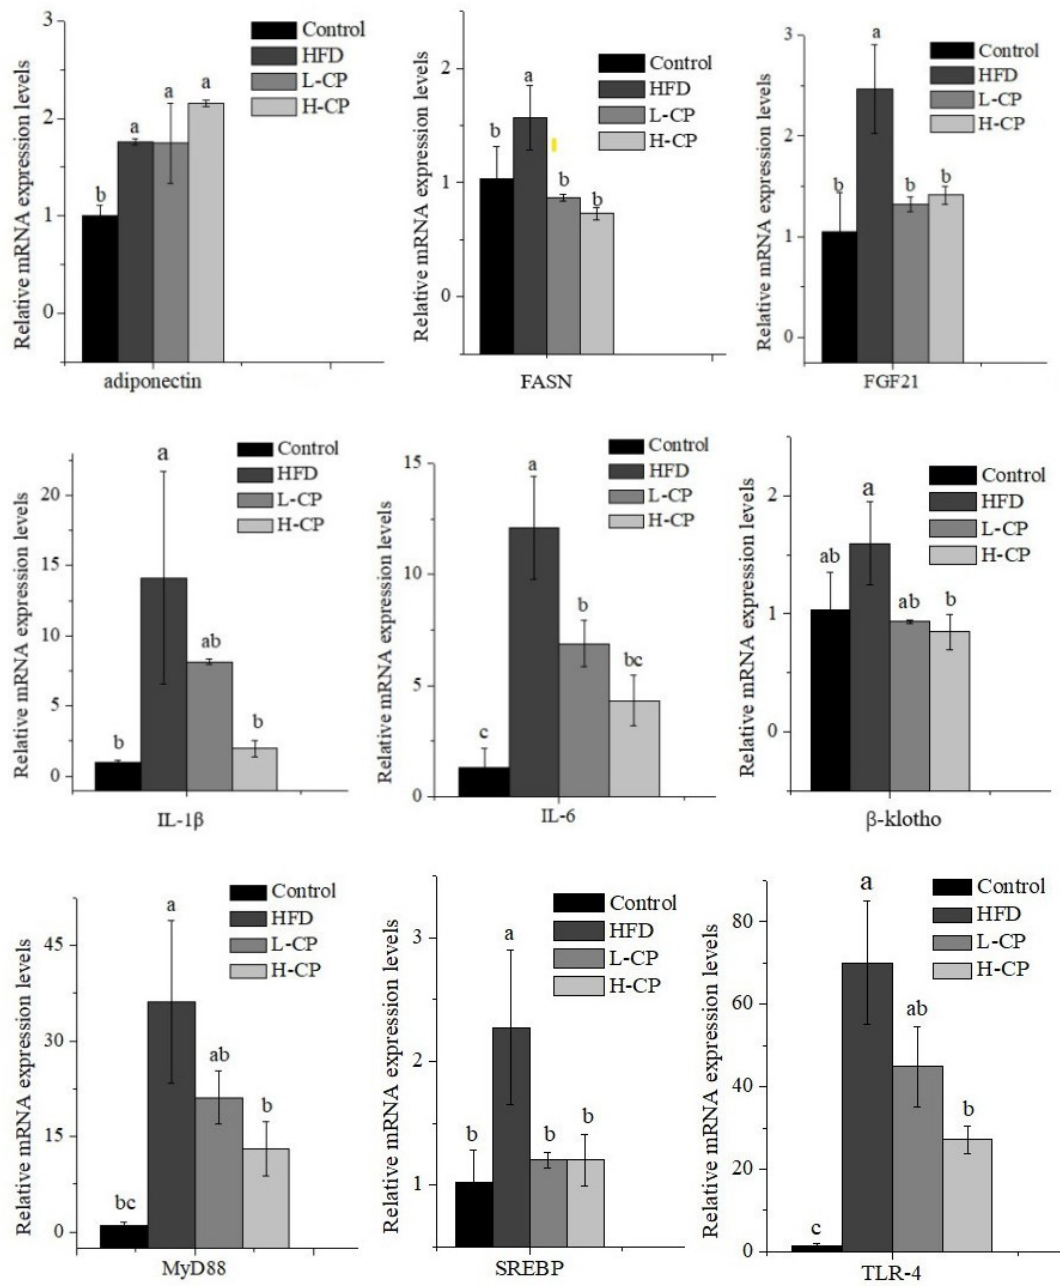

**Supplementary Figure 2.** Relative mRNA expression levels in liver.

Abbreviations: *FASN*, fatty acid synthase; *FGF21*, fibroblast growth factor 21; *IL-1 $\beta$* , Interleukin-1 $\beta$ ; *IL-6*, Interleukin-6; *MyD88*, myeloid differential protein-88; *SREBP*, sterol responsive element binding protein; *TLR-4*, toll-like receptor-4. Different letters indicated significant difference between groups (n = 3 animals/group).

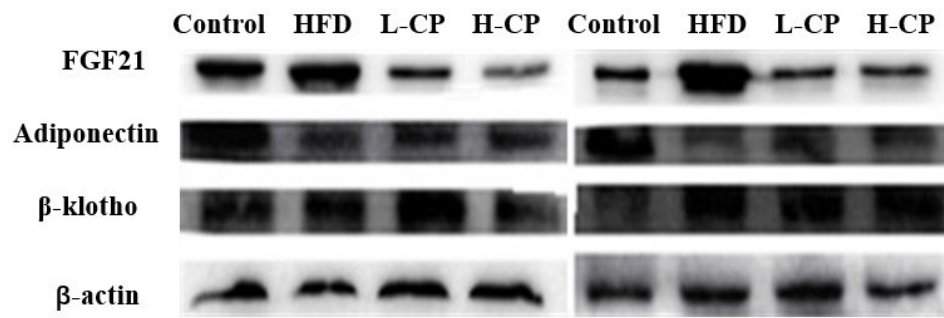

**Supplementary Figure 3.** Western blot analysis of male C57BL/6J mice. Abbreviation: FGF21, fibroblast growth factor.

**Supplementary Table 1.** Mass spectrometry data of CP extracts

| Compound                         | Formula                                                      | Retention time (min) | Theoretical precursor ion (m/z) |
|----------------------------------|--------------------------------------------------------------|----------------------|---------------------------------|
| Caffeine                         | C <sub>8</sub> H <sub>10</sub> N <sub>4</sub> O <sub>2</sub> | 0.964                | 195.0889                        |
| Delphinidin-3-rhamnoside         | C <sub>21</sub> H <sub>22</sub> O <sub>11</sub>              | 5.579                | 450.1165                        |
| Catechin                         | C <sub>15</sub> H <sub>14</sub> O <sub>6</sub>               | 5.809                | 290.0791                        |
| Rutin                            | C <sub>27</sub> H <sub>30</sub> O <sub>16</sub>              | 7.077                | 610.1537                        |
| Quercetin-3 $\beta$ -D-glucoside | C <sub>21</sub> H <sub>20</sub> O <sub>12</sub>              | 7.306                | 464.0961                        |
| Cyanidin-3-O-rutinoside          | C <sub>27</sub> H <sub>30</sub> O <sub>15</sub>              | 7.405                | 595.1651                        |
| Cyanidin-3-O-glucoside           | C <sub>21</sub> H <sub>20</sub> O <sub>11</sub>              | 7.892                | 449.1078                        |
| Quercetin                        | C <sub>15</sub> H <sub>10</sub> O <sub>7</sub>               | 9.653                | 302.0431                        |

**Supplementary Table 2.** Primers used in RT-PCR analysis.

| Gene name          |         | Sequence                |         | Sequence                |
|--------------------|---------|-------------------------|---------|-------------------------|
| <i>β-actin</i>     | Forward | CTACCTCATGAAGATCCTGACC  | Reverse | CACAGCTTCTCTTTGATGTCAC  |
| <i>adiponectin</i> | Forward | GCCGTTCTCTTCACCTACGAC   | Reverse | CCATCCCCATACACCTGGA     |
| <i>FASN</i>        | Forward | TAAAGCATGACCTCGTGATGAA  | Reverse | GAAGTTCAGTGAGGCGTAGTAG  |
| <i>FGF21</i>       | Forward | CGGTTACAATGTGTACCAGTCT  | Reverse | GTAAAGGCTCTACCATGCTCAG  |
| <i>IL-1β</i>       | Forward | TCGCAGCAGCACATCAACAAGAG | Reverse | AGGTCCACGGGAAAGACACAGG  |
| <i>IL-6</i>        | Forward | CTCCCAACAGACCTGTCTATAC  | Reverse | CCATTGCACAACCTCTTTTCTCA |
| <i>MyD88</i>       | Forward | CGGAACTTTTTCGATGCCTTTAT | Reverse | CACACACAACCTTAAGCCGATAG |
| <i>SREBP-1c</i>    | Forward | TAAAGCATGACCTCGTGATGAA  | Reverse | GAAGTTCAGTGAGGCGTAGTAG  |
| <i>TLR-4</i>       | Forward | GAAGTTCAGTGAGGCGTAGTAG  | Reverse | CCTCAGCAGGGACTTCTCAA    |
| <i>β-klotho</i>    | Forward | GAAATCCGCGTGTTTGGTTATA  | Reverse | GAAGCCGTTGTCTTGTATGATC  |

Abbreviations: *FASN*, fatty acid synthase; *FGF21*, fibroblast growth factor 21; *IL-1β*, interleukin-1β; *IL-6*, interleukin-6; *MyD88*, myeloid differential protein-88; *SREBP-1c*, sterol responsive element binding protein-1c; *TLR-4*, toll-like receptor-4.

**Supplementary Table 3.** Relative protein expression levels in liver and adipose tissues.

| protein     | Control                 | HFD                    | L-CP                    | H-CP                   | P-value |
|-------------|-------------------------|------------------------|-------------------------|------------------------|---------|
| FGF21       | 1.19±0.39 <sup>ab</sup> | 1.97±0.40 <sup>a</sup> | 1.16±0.66 <sup>ab</sup> | 0.71±0.20 <sup>b</sup> | 0.045   |
| Adiponectin | 1.07±0.16               | 0.63±0.27              | 0.68±0.23               | 0.75±0.24              | 0.167   |
| β-klotho    | 0.98±0.42               | 1.20±0.38              | 1.06±0.38               | 0.90±0.35              | 0.802   |
| UCP1        | 1.02±0.42               | 0.55±0.06              | 1.08±0.07               | 0.95±0.17              | 0.055   |
| PGC-1α      | 1.48±0.28               | 1.30±0.22              | 1.61±0.25               | 1.43±0.52              | 0.634   |

Abbreviation: FGF21, fibroblast growth factor 21; PGC-1α, peroxisome proliferator-activated receptor-gamma coactivator 1 alpha; UCP1, uncoupling protein 1. Values were presented as mean ± SD (n = 10 animals/group). Different letters indicated significant difference between groups.
